# Supplementary material for: Longitudinal Associations Between Fat‐Derived Dietary Patterns and Early Markers of Cardiovascular Disease Risk in the UK Biobank Study
Source: PubMed Central journal article supplement — J Am Heart Assoc. 2022 Jun 27;11(11):e024069. doi: 10.1161/JAHA.121.024069 (PMC9238710; doi:10.1161/jaha.121.024069), 2022-06-27

# **SUPPLEMENTAL MATERIAL**

## **Data S1.**

### **Supplemental Methods**

#### **Non-laboratory Framingham risk score**

The following criteria have been used for the calculation of non-laboratory Framingham risk score: current and past smoking status was assessed based on questions “Do you smoke tobacco now?” and “In the past, how often have you smoked tobacco?”. For this analysis, smoking was grouped into a binary variable for current smokers (yes) and non-smokers (no and previously). Medication use for blood pressure was based on the question “Do you regularly take any of the following medications? (you can select more than one answer)”. They could answer with the following: I) Cholesterol-lowering medication, II) Blood pressure medication, III) Insulin, IV) None of the above, V) Do not know or prefer not to answer. Participants who selected “do not know” or “prefer not to answer” were excluded from this study. Participants were divided into those who used blood pressure medication or those who didn’t. Diabetes status was based on the question: “Has a doctor ever told you that you have diabetes?” and could answer with either “yes”, “no”, “do not know” or “prefer not to answer”. For the purpose of this study participants who selected “do not know” or “prefer not to answer” were excluded.

**Table S1. Food groups used in dietary patterns.**

|                                        | <b>Food group</b>                     | <b>Food items included</b>                                                                                                                                                                                    |
|----------------------------------------|---------------------------------------|---------------------------------------------------------------------------------------------------------------------------------------------------------------------------------------------------------------|
| <b>Cereals</b><br><br>(6 items)        | 1. Pasta, rice and cereals            | White rice, couscous, white pasta                                                                                                                                                                             |
|                                        | 2. Whole meal pasta, rice and cereals | Brown rice and whole meal pasta                                                                                                                                                                               |
|                                        | 3. White bread                        | Sliced bread, baguette, bap, bread roll and other bread                                                                                                                                                       |
|                                        | 4. Whole meal bread                   | Whole meal sliced bread, whole meal baguette, whole meal bap, whole meal bread roll, mixed sliced bread, seeded sliced bread, mixed baguette, seeded baguette, mixed bap, seeded bap, mixed roll, seeded roll |
|                                        | 5. High fibre breakfast cereals       | Whole wheat cereal, bran cereal, porridge, muesli, oat crunch, oatcakes                                                                                                                                       |
|                                        | 6. Other breakfast cereals            | Other cereal, plain cereal and sweet cereal                                                                                                                                                                   |
| <b>Dairy products</b><br><br>(8 items) | 7. Whole milk                         | Whole milk >3.6g fat per 100g                                                                                                                                                                                 |
|                                        | 8. Skimmed milk                       | Skimmed milk and semi skimmed milk >1g fat per 100g                                                                                                                                                           |
|                                        | 9. Other milk                         | Rice milk, oat milk and soy milk                                                                                                                                                                              |
|                                        | 10. Cheese                            | Goat cheese, hard cheese, soft cheese, blue cheese, cheese spread, feta, mozzarella, other cheese                                                                                                             |

|                              |                                               |                                                                            |
|------------------------------|-----------------------------------------------|----------------------------------------------------------------------------|
|                              | 11. Low fat cheese                            | Low fat hard cheese, low fat cheese spread and cottage cheese              |
|                              | 12. Yoghurt low fat                           | Low fat yogurt                                                             |
|                              | 13. Yoghurt full fat                          | Full fat yogurt                                                            |
|                              | 14. Ice cream, cream and dairy desserts       | Cream, ice-cream, milk-based pudding, other milk based pudding, cheesecake |
| <b>Fat spreads</b>           | 15. Butter                                    | Animal fat spread lower and normal fat                                     |
| (5 items)                    | 16. Margarine                                 | Plant-based spread lower and normal fat                                    |
|                              | 17. Olive oil                                 | Olive oil (drizzling/dunking)                                              |
|                              | 18. High-fat sauces                           | Cheese sauce, white sauce and gravy                                        |
|                              | 19. Low-fat sauces                            | Chutney, ketchup, brown sauce, tomato sauce                                |
| <b>Meat and alternatives</b> | 20. Bacon and ham                             | Bacon, ham, sausages                                                       |
| (10 items)                   | 21. Beef and veal                             | Beef and veal                                                              |
|                              | 22. Non fried chicken, turkey pork and dishes | Poultry and pork                                                           |
|                              | 23. Fried poultry                             | Breaded poultry, battered poultry                                          |
|                              | 24. Other meats                               | Other meat, offal                                                          |
|                              | 25. White fish                                | White fish and tinned tuna                                                 |
|                              | 26. Battered and fish products                | Battered fish, breaded fish, sushi                                         |
|                              | 27. Oily fish                                 | Oily fish                                                                  |

|                                          |                               |                                                                                                                                                                                                                                                                                                                                  |
|------------------------------------------|-------------------------------|----------------------------------------------------------------------------------------------------------------------------------------------------------------------------------------------------------------------------------------------------------------------------------------------------------------------------------|
|                                          | 28. Other seafood             | Prawns, lobster, crab and shellfish                                                                                                                                                                                                                                                                                              |
|                                          | 29. Eggs and eggs dishes      | Whole egg, omelet, scotch egg, other egg and egg sandwiches                                                                                                                                                                                                                                                                      |
|                                          | 30. Meat alternatives         | Vegetarian sausages/burger, other vegetarian alternatives, tofu and quorn                                                                                                                                                                                                                                                        |
| <b>Fruit and Vegetables</b><br>(6 items) | 31. Vegetables raw and boiled | Side salad, beetroot, cabbage, kale, carrot, celery, courgette, cucumber, lettuce, fresh tomato, turnip, swede, watercress, vegetable in pieces, broccoli, butter squash, cauliflower, garlic, leek, onion, parsnip, sweet pepper, spinach, sprouts, tinned tomato, other vegetables, sweet potato, mushroom, sweet corn, olives |
|                                          | 32. Vegetables (mixed dishes) | Vegetable salad with mayo, hummus, guacamole,                                                                                                                                                                                                                                                                                    |
|                                          | 33. Legumes                   | Green bean, broad bean, pea, baked beans, pulses, corn                                                                                                                                                                                                                                                                           |
|                                          | 34. Fruits                    | Apple, avocado, mixed fruit, banana, berry, cherry, grapefruit, grape, mango, melon, orange, satsuma, peach nectarine, pear, pineapple, plum, other fruit, prune and dried fruit                                                                                                                                                 |
|                                          | 35. Boiled and baked potato   | Boiled baked potato and mashed potato                                                                                                                                                                                                                                                                                            |
|                                          | 36. Soups                     | Homemade pulse soup, homemade meat soup, homemade fish soup, homemade vegetables soup,                                                                                                                                                                                                                                           |

|                                  |                                                              |                                                                                                                                                               |
|----------------------------------|--------------------------------------------------------------|---------------------------------------------------------------------------------------------------------------------------------------------------------------|
|                                  |                                                              | homemade pasta soup, homemade other soup, canned pulse soup, canned meat soup, canned fish soup, canned vegetables soup, canned pasta soup, canned other soup |
| <b>Nuts and seeds</b>            | 37. Nuts and seeds                                           | Unsalted peanuts, unsalted nuts, seeds,                                                                                                                       |
|                                  | (1 item)                                                     |                                                                                                                                                               |
| <b>Discretionary snack foods</b> | 38. Crisps, chips and savory snacks                          | Pizza, crisp, fried potato, cheesy biscuits, salted nuts, salted peanuts, crisp bread, Indian snacks                                                          |
|                                  | (3 items)                                                    |                                                                                                                                                               |
|                                  | 39. Buns, cakes, pastries and fruit pies, puddings, biscuits | Fruit cake, scone, sponge pudding, crumble, danish, doughnut, pancake, cereal bar, chocolate covered biscuit and sweet biscuit                                |
|                                  | 40. Sugar, preserves and confectionery                       | Spreads like jam and honey, stewed fruit, dark chocolate, milk chocolate, other chocolate, chocolate covered raisins, white chocolate                         |
| <b>Non-alcoholic beverages</b>   | 41. Fruit juice                                              | Orange juice, grapefruit juice, pure fruit and vegetable juice, fruit smoothie                                                                                |
|                                  | (5 items)                                                    |                                                                                                                                                               |
|                                  | 42. High sugar beverages                                     | Fizzy drink, hot chocolate and dairy smoothie                                                                                                                 |
|                                  | 43. Soft drinks, diet                                        | Low calorie drink and low-calorie hot chocolate                                                                                                               |
|                                  | 44. Tea and Coffee                                           | Cappuccino, green tea, herbal tea, other tea, espresso, other coffee, instant coffee, filtered coffee, latte, standard tea, rooibos tea                       |

|                  |                          |                                                    |
|------------------|--------------------------|----------------------------------------------------|
|                  | 45. Water                | Water                                              |
| <b>Alcoholic</b> | 46. Spirits and liqueurs | Spirits and other alcohol                          |
| <b>beverages</b> | 47. Wine                 | Red wine, rose wine, white wine and fortified wine |
| (3 items)        | 48. Beer and cider       | Beer and cider                                     |

---

\*Food groups were selected based on food groupings used the National Diet and Nutrition Survey (NDNS) from the UK and adapted according to their fat type of content. (39)

**Table S2. Characteristics at baseline overall and according to tertiles of dietary patterns (n =12,706).**

| Characteristics                   | All<br>(n=12,706) | Tertiles of DP1 |              |              | Tertiles of DP2 |              |              |
|-----------------------------------|-------------------|-----------------|--------------|--------------|-----------------|--------------|--------------|
|                                   |                   | T1              | T2           | T3           | T1              | T2           | T3           |
| Age (years), mean ( $\pm$ SD)     | 55.0 (7.4)        | 55.1 (7.2)      | 55.0 (7.4)   | 54.9 (7.5)   | 54.9 (7.4)      | 54.9 (7.4)   | 55.3 (7.4)   |
| Female, n (%)                     | 6,753 (53.1)      | 2,069 (48.8)    | 2,386 (56.3) | 2,298 (54.2) | 2,271 (53.5)    | 2,392 (56.4) | 2,090 (49.3) |
| Townsend deprivation index, n (%) |                   |                 |              |              |                 |              |              |
| Low                               | 5,169 (40.6)      | 1,746 (41.2)    | 1,755 (41.4) | 1,668 (39.3) | 1,729 (40.7)    | 1,743 (41.1) | 1,697 (40.0) |
| Medium                            | 4,402 (34.6)      | 1,472 (34.7)    | 1,456 (34.3) | 1,474 (34.8) | 1,424 (33.6)    | 1,491 (35.1) | 1,487 (35.1) |
| High                              | 3,155 (24.8)      | 1,024 (24.1)    | 1,031 (24.3) | 1,100 (25.9) | 1,089 (25.7)    | 1,008 (23.8) | 1,058 (24.9) |
| Ethnicity, n (%)                  |                   |                 |              |              |                 |              |              |
| White                             | 12,407 (97.8)     | 4,122 (97.4)    | 4,122 (97.9) | 4,141 (98.0) | 4,081 (96.6)    | 4,156 (98.2) | 4,170 (98.6) |
| Mixed                             | 239 (1.9)         | 92 (2.2)        | 72 (1.7)     | 75 (1.8)     | 122 (2.9)       | 64 (1.5)     | 53 (1.2)     |
| Other                             | 44 (0.3)          | 17 (0.4)        | 18 (0.4)     | 9 (0.2)      | 23 (0.5)        | 14 (0.3)     | 7 (0.2)      |



|                                        |              |              |              |              |              |              |              |
|----------------------------------------|--------------|--------------|--------------|--------------|--------------|--------------|--------------|
| Smoking, n (%)                         |              |              |              |              |              |              |              |
| Yes                                    | 693 (94.6)   | 234 (5.5)    | 220 (5.2)    | 239 (5.6)    | 189 (4.5)    | 200 (4.7)    | 304 (7.2)    |
| No                                     | 12,033 (5.4) | 4,008 (94.5) | 4,022 (94.8) | 4,003 (94.4) | 4,053 (95.5) | 4,042 (95.3) | 3,938 (92.8) |
| Physical Activity <sup>†</sup> , n (%) |              |              |              |              |              |              |              |
| Light                                  | 2,666 (21.0) | 817 (19.2)   | 895 (21.1)   | 954 (22.5)   | 750 (17.7)   | 934 (22.0)   | 982 (23.1)   |
| Moderate                               | 6,878 (54.0) | 2,267 (53.4) | 2,343 (55.2) | 2,268 (53.5) | 2,349 (55.4) | 2,277 (53.7) | 2,252 (53.1) |
| Vigorous                               | 3,182 (25.0) | 1,158 (27.3) | 1,004 (23.7) | 1,020 (24.0) | 1,143 (26.9) | 1,031 (24.3) | 1,008 (23.8) |
| BMI category <sup>‡</sup> , n (%)      |              |              |              |              |              |              |              |
| Underweight/normal weight              | 5,481 (43.1) | 1,757 (41.4) | 1,861 (43.9) | 1,863 (43.9) | 1,902 (44.8) | 1,809 (42.6) | 1,770 (41.7) |
| Overweight                             | 5,311 (41.7) | 1,851 (43.6) | 1,755 (41.4) | 1,705 (40.2) | 1,746 (41.2) | 1,770 (41.7) | 1,795 (42.3) |
| Obesity                                | 1,934 (15.2) | 634 (14.9)   | 626 (14.8)   | 674 (15.9)   | 594 (14.0)   | 663 (15.6)   | 677 (16.0)   |

---

\* SD, standard deviation; BMI, Body Mass Index.

<sup>†</sup> Physical activity: light (total MET-hour a week < 10), moderate (total MET-hour a week ≥10 and <50) and vigorous (total MET-hour a week >50)

<sup>‡</sup> Underweight/normal weight (BMI <25 kg/m<sup>2</sup>), Overweight (BMI ≥25 kg/m<sup>2</sup> and <30 kg/m<sup>2</sup>), Obesity (BMI ≥30 kg/m<sup>2</sup>)

**Table S3. Baseline characteristics of the participants included in the analysis (n =12,706) vs excluded (n =489,799).**

| Characteristics                        | Included<br>(n=12,706) | Excluded<br>(n =489,799) |
|----------------------------------------|------------------------|--------------------------|
| Age (years), mean ( $\pm$ SD)          | 55.0 (7.4)             | 56.6 (8.1)               |
| Female, n (%)                          | 6,741 (53.1)           | 266,617 (54.4)           |
| Townsend deprivation index, n (%)      |                        |                          |
| Low                                    | 5,160 (40.6)           | 162,204 (33.2)           |
| Medium                                 | 4,392 (34.6)           | 162,799 (33.3)           |
| High                                   | 3,154 (24.8)           | 164,132 (33.5)           |
| Ethnicity, n (%)                       |                        |                          |
| White                                  | 12,287 (97.8)          | 460,269 (94.5)           |
| Mixed                                  | 238 (1.9)              | 22,235 (4.6)             |
| Other                                  | 45 (0.3)               | 4,514 (0.9)              |
| Smoking, n (%)                         |                        |                          |
| Yes                                    | 698 (5.5)              | 52,283 (10.7)            |
| No                                     | 12,008 (94.5)          | 437,496 (89.3)           |
| Physical Activity <sup>†</sup> , n (%) |                        |                          |
| Light                                  | 2,659 (20.9)           | 112,537 (23.0)           |
| Moderate                               | 6,873 (54.1)           | 245,798 (50.2)           |
| Vigorous                               | 3,174 (25.0)           | 131,444 (26.8)           |
| BMI category <sup>‡</sup> , n (%)      |                        |                          |
| Underweight/normal weight              | 5,484 (43.1)           | 159,547 (32.8)           |
| Overweight                             | 5,303 (41.7)           | 206,799 (42.5)           |
| Obesity                                | 1,919 (15.2)           | 120,308 (24.7)           |

|                          |              |              |
|--------------------------|--------------|--------------|
| Framingham risk score    | 13.1 (8.73)  | 15.3 (9.31)  |
| Systolic blood pressure  | 135.0 (17.9) | 137.9 (18.7) |
| Diastolic blood pressure | 81.3 (10.0)  | 82.2 (10.2)  |

---

\*SD, standard deviation; BMI, Body Mass Index.

† Physical activity: light (total MET-hour a week < 10), moderate (total MET-hour a week  $\geq 10$  and <50) and vigorous (total MET-hour a week >50)

‡ Underweight/normal weight (BMI <25 kg/m<sup>2</sup>), Overweight (BMI  $\geq 25$  kg/m<sup>2</sup> and <30 kg/m<sup>2</sup>), Obesity (BMI  $\geq 30$  kg/m<sup>2</sup>)

**Table S4. Intakes of response variables and five highest loading direct and inverse food groups across tertiles of dietary patterns (n =12,706).**

| Food groups                 | Factor loading | Consumers (%) | Tertiles of dietary pattern |      |        |            |           |      |        |            |           |      |        |            |
|-----------------------------|----------------|---------------|-----------------------------|------|--------|------------|-----------|------|--------|------------|-----------|------|--------|------------|
|                             |                |               | Tertile 1                   |      |        |            | Tertile 2 |      |        |            | Tertile 3 |      |        |            |
|                             |                |               | Mean                        | SD   | Median | IQR        | Mean      | SD   | Median | IQR        | Mean      | SD   | Median | IQR        |
| <b>Dietary pattern 1</b>    |                |               |                             |      |        |            |           |      |        |            |           |      |        |            |
| Response variables          |                |               |                             |      |        |            |           |      |        |            |           |      |        |            |
| SFA (%E/day)                | -              | -             | 9.55                        | 2.25 | 9.50   | 8.01, 11.1 | 11.6      | 2.30 | 11.5   | 10.0, 13.1 | 13.2      | 2.71 | 13.0   | 11.3, 14.9 |
| PUFA (%E/day)               | -              | -             | 4.61                        | 1.06 | 4.52   | 3.89, 5.25 | 5.48      | 1.11 | 5.40   | 4.70, 6.20 | 6.56      | 1.59 | 6.37   | 5.44, 7.47 |
| MUFA (%E/day)               | -              | -             | 9.32                        | 1.74 | 9.30   | 8.18, 10.4 | 11.2      | 1.57 | 11.1   | 10.2, 12.2 | 13.1      | 1.9  | 12.9   | 11.8, 14.2 |
| Direct associations         |                |               |                             |      |        |            |           |      |        |            |           |      |        |            |
| (g/day)                     |                |               |                             |      |        |            |           |      |        |            |           |      |        |            |
| Nuts and seeds              | 0.36           | 46.5          | 2.05                        | 4.53 | 0      | 0, 2.25    | 3.47      | 6.36 | 0      | 0, 4.5     | 8.38      | 13.9 | 2.00   | 0, 11.0    |
| Vegetables and mixed dishes | 0.29           | 23.6          | 2.27                        | 6.74 | 0      | 0, 0       | 4.08      | 10.3 | 0      | 0, 0       | 10.6      | 20.6 | 0      | 0, 13.0    |
| Butter                      | 0.28           | 50.3          | 3.30                        | 5.74 | 0      | 0, 5.00    | 5.50      | 7.52 | 1.67   | 0, 9.33    | 9.25      | 10.6 | 6.0    | 0, 15.5    |
| Eggs and egg dishes         | 0.27           | 46.1          | 12.07                       | 21.6 | 0      | 0, 16.7    | 18.6      | 27.9 | 0      | 0, 30.0    | 31.4      | 41.6 | 16.7   | 0, 50.0    |

|                          |       |      |      |      |       |            |      |      |      |            |      |      |      |            |
|--------------------------|-------|------|------|------|-------|------------|------|------|------|------------|------|------|------|------------|
| Buns, cakes and pastries | 0.24  | 88.7 | 40.1 | 34.5 | 32.5  | 14.0, 60.0 | 53.6 | 40.9 | 45   | 24.0, 76.5 | 66.5 | 49.9 | 58.3 | 30, 90.2   |
| Inverse associations     |       |      |      |      |       |            |      |      |      |            |      |      |      |            |
| (g/d/day)                |       |      |      |      |       |            |      |      |      |            |      |      |      |            |
| Fruits                   | -0.25 | 93.5 | 294  | 166  | 223   | 135, 334   | 192  | 128  | 175  | 100, 266   | 163  | 125  | 143  | 70.4, 230  |
| Legumes                  | -0.25 | 61.0 | 24.4 | 32.1 | 16.3  | 0, 35.0    | 21.0 | 26.2 | 13   | 0, 33.3    | 21.1 | 27.2 | 11.7 | 0, 33.7    |
| Beer and cider           | -0.22 | 33.1 | 240  | 268  | 0     | 0, 287     | 123  | 268  | 0    | 0, 143     | 89.7 | 219  | 0    | 0, 71.7    |
| Wine                     | -0.21 | 58.2 | 151  | 178  | 87.5  | 0, 250     | 103  | 134  | 58.3 | 0, 175     | 79.1 | 115  | 21.9 | 0, 125     |
| Yoghurt low fat          | -0.21 | 47.1 | 46.4 | 55.8 | 31.3  | 0, 78.1    | 31.9 | 43.9 | 0    | 0, 62.5    | 22.1 | 37.2 | 0    | 0, 31.2    |
| <b>Dietary pattern 2</b> |       |      |      |      |       |            |      |      |      |            |      |      |      |            |
| Response variables       |       |      |      |      |       |            |      |      |      |            |      |      |      |            |
| SFA (%E/day)             | -     |      | 9.53 | 2.23 | 9.51  | 7.98, 11.0 | 11.1 | 2.17 | 11.1 | 9.65, 12.5 | 13.7 | 2.42 | 13.5 | 12.0, 15.2 |
| PUFA (%E/day)            | -     |      | 6.53 | 1.62 | 6.42  | 5.38, 7.49 | 5.30 | 1.20 | 5.24 | 4.49, 6.05 | 4.82 | 1.08 | 4.74 | 4.08, 5.47 |
| MUFA (%E/day)            | -     |      | 11.3 | 2.58 | 11.20 | 9.58, 12.9 | 10.9 | 2.30 | 10.9 | 9.46, 12.4 | 11.4 | 2.11 | 11.4 | 10.0, 12.8 |
| Direct associations      |       |      |      |      |       |            |      |      |      |            |      |      |      |            |
| (g/day)                  |       |      |      |      |       |            |      |      |      |            |      |      |      |            |
| Butter                   | 0.37  | 50.3 | 2.42 | 4.92 | 0     | 0, 3.20    | 4.76 | 6.78 | 0    | 0, 7.5     | 10.9 | 10.6 | 8.75 | 0, 17.5    |
| High-fat cheese          | 0.34  | 67.1 | 8.54 | 11.2 | 5.00  | 0, 13.3    | 12.2 | 12.5 | 10.0 | 0, 20.0    | 22.7 | 19.2 | 20.0 | 10, 33.3   |

|                                |       |      |      |      |      |            |      |      |      |            |      |      |      |            |
|--------------------------------|-------|------|------|------|------|------------|------|------|------|------------|------|------|------|------------|
| Ice cream and dairy<br>desert  | 0.27  | 47.1 | 13.6 | 25.5 | 0    | 0, 20.0    | 21.7 | 31.1 | 0    | 0, 37.5    | 39.1 | 47.3 | 25.0 | 0, 60.0    |
| Beef and veal                  | 0.24  | 50.7 | 16.8 | 27.3 | 0    | 0, 30.0    | 27.6 | 32.8 | 20.0 | 0, 48.0    | 40.8 | 40.4 | 40.0 | 0, 60.0    |
| Buns, cakes and<br>pastries    | 0.21  | 88.7 | 41.9 | 37.7 | 34   | 14.0, 60.7 | 51.6 | 39.8 | 44.0 | 23.3, 72.2 | 66.7 | 48.9 | 59.6 | 30.1, 91.3 |
| Inverse associations           |       |      |      |      |      |            |      |      |      |            |      |      |      |            |
| (g/day)                        |       |      |      |      |      |            |      |      |      |            |      |      |      |            |
| Nuts and seeds                 | -0.36 | 46.5 | 9.21 | 14.1 | 3.00 | 0, 13.3    | 2.76 | 5.33 | 0    | 0, 3.00    | 1.94 | 4.29 | 0    | 0, 2.00    |
| Vegetables and<br>mixed dishes | -0.26 | 23.6 | 10.8 | 20.4 | 0    | 0, 13.0    | 4.07 | 10.1 | 0    | 0, 0       | 2.09 | 7.19 | 0    | 0, 0       |
| Vegetables raw and<br>boiled   | -0.20 | 95.3 | 213  | 145  | 185  | 111, 288   | 167  | 112  | 150  | 85.5, 228  | 148  | 105  | 130  | 72.0, 204  |
| Margarine                      | -0.19 | 51.6 | 7.34 | 8.47 | 5    | 0, 12.0    | 5.07 | 6.65 | 2.45 | 0, 8.50    | 3.39 | 5.77 | 0    | 0, 5.00    |
| Meat alternatives              | -0.18 | 8.70 | 8.87 | 26.5 | 0    | 0, 0       | 2.72 | 12.0 | 0    | 0, 0       | 1.51 | 8.72 | 0    | 0, 0       |

\* %E, percentage of total energy; SFA, saturated fatty acids; PUFA, polyunsaturated fatty acids; MUFA, monounsaturated fatty acids.

**Table S5. Intakes of response variables and five highest loading direct and inverse food groups by sex (n =12,706).**

| Food groups                 | Consume<br>rs (%) ‡ | All (n=12,706) |                   | Males (n=5,965) |                   | Females (n=6,741) |                   | B (95% CI) †         | P value† |
|-----------------------------|---------------------|----------------|-------------------|-----------------|-------------------|-------------------|-------------------|----------------------|----------|
|                             |                     | Mean ± SD      | Median (IQR)      | Mean ± SD       | Median (IQR)      | Mean ± SD         | Median (IQR)      |                      |          |
| <b>Response variables</b>   |                     |                |                   |                 |                   |                   |                   |                      |          |
| SFA (%E/day)                | -                   | 11.4 ± 2.84    | 11.3 (9.45, 13.3) | 11.4 ± 2.84     | 11.3 (9.42, 13.2) | 11.5 ± 2.85       | 11.4 (9.51, 13.3) | -0.11 (-0.21, -0.01) | 0.027    |
| PUFA (%E/day)               | -                   | 5.56 ± 1.51    | 5.36 (4.50, 6.40) | 5.42 ± 1.46     | 5.22 (4.41, 6.24) | 5.67 ± 1.54       | 5.47 (4.59, 6.54) | -0.23 (-0.29, -0.18) | <0.001   |
| MUFA (%E/day)               | -                   | 11.2 ± 2.35    | 11.2 (9.68, 12.7) | 11.2 ± 2.32     | 11.1 (9.61, 12.6) | 11.3 ± 2.37       | 11.2 (9.76, 12.7) | -0.13 (-0.21, -0.04) | 0.003    |
| <b>Dietary pattern 1</b>    |                     |                |                   |                 |                   |                   |                   |                      |          |
| Direct associations         |                     |                |                   |                 |                   |                   |                   |                      |          |
| (g/day)                     |                     |                |                   |                 |                   |                   |                   |                      |          |
| Nuts and seeds              | 46.5                | 0 ± 9.64       | 0 (0, 4.84)       | 4.57 ± 10.1     | 0 (0, 4.50)       | 4.73 ± 9.22       | 0.50 (0, 5.00)    | 0.11 (0.05, 0.17)    | <0.001   |
| Vegetables and mixed dishes | 23.6                | 5.68 ± 14.3    | 0 (0, 0)          | 5.08 ± 13.7     | 0 (0, 0)          | 6.20 ± 14.8       | 0 (0, 6.5)        | 0.06 (0.01, 0.11)    | 0.049    |
| Butter                      | 50.3                | 6.02 ± 8.56    | 1.50 (0, 10.0)    | 6.80 ± 9.60     | 0 (0, 11.0)       | 5.33 ± 7.48       | 1.75 (0, 8.52)    | 0.28 (0.24, 0.32)    | <0.001   |
| Eggs and egg dishes         | 46.1                | 20.7 ± 32.5    | 0 (0, 33.3)       | 21.5 ± 33.6     | 0 (0, 33.3)       | 19.9 ± 31.4       | 0 (0, 30.0)       | 0.04 (0.01, 0.08)    | 0.017    |
| Buns, cakes and pastries    | 88.7                | 53.3 ± 43.5    | 44.5 (21.7, 76.0) | 58.0 ± 46.9     | 49.1 (23.7, 82.7) | 49.2 ± 39.9       | 41.7 (20.0, 69.6) | 0.16 (0.13, 0.19)    | <0.001   |

---

| Inverse associations          |      |             |                   |             |                   |             |                   |                      |        |
|-------------------------------|------|-------------|-------------------|-------------|-------------------|-------------|-------------------|----------------------|--------|
| (g/d/day)                     |      |             |                   |             |                   |             |                   |                      |        |
| Fruits                        | 93.5 | 201 ± 145   | 177 (100, 275)    | 192 ± 145   | 166 (88.5, 268)   | 210 ± 145   | 187 (108, 281)    | -0.10 (-0.13, -0.07) | <0.001 |
| Legumes                       | 61.0 | 22.3 ± 28.7 | 13.5 (0, 33.7)    | 24.1 ± 30.7 | 16.2 (0, 35.0)    | 20.7 ± 26.7 | 11.7 (0, 32.0)    | 0.11 (0.07, 0.15)    | <0.001 |
| Beer and cider                | 33.1 | 150 ± 335   | 0 (0, 143)        | 277 ± 438   | 71.7 (0, 382)     | 39.8 ± 129  | 0 (0, 0)          | 0.78 (0.73, 0.84)    | <0.001 |
| Wine                          | 58.2 | 111 ± 148   | 58.3 (0, 175)     | 158 ± 158   | 43.7 (0, 175)     | 107 ± 138   | 60.0 (0, 175)     | 0.13 (0.09, 0.17)    | <0.001 |
| Yoghurt low fat               | 47.1 | 33.4 ± 47.3 | 0 (0, 62.5)       | 42.3 ± 42.3 | 0 (0, 41.7)       | 39.0 ± 50.6 | 20.8 (0, 62.5)    | -0.07 (-0.10, -0.03) | <0.001 |
| <b>Dietary pattern 2</b>      |      |             |                   |             |                   |             |                   |                      |        |
| Direct associations           |      |             |                   |             |                   |             |                   |                      |        |
| (g/day)                       |      |             |                   |             |                   |             |                   |                      |        |
| Butter                        | 50.3 | 6.02 ± 8.56 | 1.50 (0, 10.0)    | 6.80 ± 9.60 | 0 (0, 11.0)       | 5.33 ± 7.48 | 1.75 (0, 8.52)    | 0.28 (0.24, 0.32)    | <0.001 |
| High-fat cheese               | 67.1 | 14.5 ± 15.9 | 10.0 (0, 20.0)    | 15.3 ± 17.0 | 10.0 (0, 21.2)    | 13.8 ± 14.8 | 10.0 (0, 20.0)    | 0.11 (0.08, 0.14)    | <0.001 |
| Ice cream and dairy<br>desert | 47.1 | 24.7 ± 37.2 | 0 (0, 40.0)       | 26.4 ± 39.6 | 0 (0, 40.0)       | 23.1 ± 35.0 | 0 (0, 40.0)       | 0.16 (0.12, 0.20)    | <0.001 |
| Beef and veal                 | 50.7 | 28.5 ± 35.4 | 15.0 (0, 60.0)    | 32.1 ± 37.6 | 30 (0, 60.0)      | 25.3 ± 33.0 | 0 (0, 40.0)       | 0.07 (0.05, 0.10)    | <0.001 |
| Buns, cakes and<br>pastries   | 88.7 | 53.3 ± 43.5 | 44.5 (21.7, 76.0) | 58.0 ± 46.9 | 49.1 (23.7, 82.7) | 49.2 ± 39.9 | 41.7 (20.0, 69.6) | 0.16 (0.13, 0.19)    | <0.001 |

---



| Inverse associations        |      |             |                 |             |                 |             |                |                      |        |
|-----------------------------|------|-------------|-----------------|-------------|-----------------|-------------|----------------|----------------------|--------|
| (g/day)                     |      |             |                 |             |                 |             |                |                      |        |
| Nuts and seeds              | 46.5 | 0 ± 9.64    | 0 (0, 4.84)     | 4.57 ± 10.1 | 0 (0, 4.50)     | 4.73 ± 9.22 | 0.50 (0, 5.00) | 0.11 (0.05, 0.17)    | <0.001 |
| Vegetables and mixed dishes | 23.6 | 5.68 ± 14.3 | 0 (0, 0)        | 5.08 ± 13.7 | 0 (0, 0)        | 6.20 ± 14.8 | 0 (0, 6.5)     | 0.06 (0.01, 0.11)    | 0.049  |
| Vegetables raw and boiled   | 95.3 | 176 ± 125   | 153 (87.9, 238) | 153 ± 117   | 131 (71.5, 206) | 196 ± 128   | 175 (105, 263) | -0.27 (-0.29, -0.24) | <0.001 |
| Margarine                   | 51.6 | 5.28 ± 7.24 | 1.75 (0, 8.75)  | 7.1 ± 8.5   | 4.39 (0, 12.0)  | 3.68 ± 5.41 | 0 (0, 6.20)    | 0.42 (0.39, 0.46)    | <0.001 |
| Meat alternatives           | 8.70 | 4.38 ± 17.8 | 0 (0, 0)        | 3.96 ± 17.7 | 0 (0, 0)        | 4.76 ± 17.9 | 0 (0, 0)       | 0.10 (0.02, 0.18)    | 0.011  |

\*%E, percentage of total energy; SFA, saturated fatty acids; PUFA, polyunsaturated fatty acids; MUFA, monounsaturated fatty acids.

† P value, beta coefficient and 95% confidence interval for linear regression analysis for dietary components differences between males and females adjusted for age, smoking status and BMI.

‡ % of non-zero consumers for each food group.

**Table S6. Energy and nutrient intake across tertiles of dietary patterns (n =12,706).**

|                           | Tertiles of dietary pattern |       |           |       |           |       |
|---------------------------|-----------------------------|-------|-----------|-------|-----------|-------|
|                           | Tertile 1                   |       | Tertile 2 |       | Tertile 3 |       |
|                           | Mean                        | SD    | Mean      | SD    | Mean      | SD    |
| <b>Dietary pattern 1</b>  |                             |       |           |       |           |       |
| Total energy (kj/day)     | 8,400                       | 1,900 | 8,379     | 1,861 | 9,098     | 1,968 |
| Carbohydrate (%E/day)     | 52.9                        | 7.64  | 50.4      | 6.39  | 47.1      | 6.48  |
| Protein (%E/day)          | 16.1                        | 3.02  | 16.2      | 2.95  | 15.9      | 2.96  |
| Total fat (%E/day)        | 25.9                        | 3.96  | 31.1      | 3.23  | 36.1      | 4.12  |
| Animal fat (%E/day)       | 14.1                        | 3.89  | 17.5      | 4.26  | 20.5      | 5.56  |
| Vegetable fat (%E/day)    | 11.8                        | 3.52  | 13.6      | 3.84  | 15.6      | 4.91  |
| Trans fat (%E/day)        | 0.43                        | 0.16  | 0.51      | 0.18  | 0.58      | 0.20  |
| Omega-3 (g/day)           | 1.67                        | 0.68  | 1.93      | 0.71  | 2.39      | 0.83  |
| Omega-6 (g/day)           | 8.85                        | 3.16  | 10.4      | 3.23  | 13.6      | 4.47  |
| Energy density (kj/g/day) | 5.83                        | 1.23  | 6.45      | 1.31  | 7.07      | 1.41  |
| Fiber (g/day)             | 18.2                        | 5.86  | 17.5      | 5.28  | 18.2      | 5.58  |
| <b>Dietary pattern 2</b>  |                             |       |           |       |           |       |
| Total energy (kj/day)     | 8,563                       | 1,943 | 8,272     | 1,848 | 9,042     | 1,947 |
| Carbohydrate (%E/day)     | 50.9                        | 7.48  | 50.6      | 7.28  | 48.9      | 6.87  |
| Protein (%E/day)          | 16.4                        | 3.11  | 16.2      | 2.99  | 15.6      | 2.76  |
| Total fat (%E/day)        | 30.0                        | 5.91  | 30.1      | 5.39  | 32.9      | 5.01  |
| Animal fat (%E/day)       | 14.3                        | 4.62  | 17.1      | 4.36  | 20.8      | 4.73  |
| Vegetable fat (%E/day)    | 15.8                        | 4.90  | 13.1      | 3.80  | 12.2      | 3.61  |
| Trans fat (%E/day)        | 0.40                        | 0.16  | 0.49      | 0.16  | 0.63      | 0.18  |
| Omega-3 (g/day)           | 2.28                        | 0.90  | 1.87      | 0.72  | 1.84      | 0.69  |
| Omega-6 (g/day)           | 12.8                        | 4.71  | 10.1      | 3.61  | 10.0      | 3.44  |
| Energy density (kj/g/day) | 6.01                        | 1.31  | 6.36      | 1.35  | 6.99      | 1.44  |

|               |      |      |      |      |      |      |
|---------------|------|------|------|------|------|------|
| Fiber (g/day) | 20.1 | 6.03 | 17.1 | 5.05 | 16.8 | 5.03 |
|---------------|------|------|------|------|------|------|

---

\*%E, percentage of total energy intake, kj, kilojoules, g, grams; SD, standard deviation.

**Table S7. Energy and nutrient intake by sex (n =12,706).**

|                           | All (n=12,706) |      | Males<br>(n=5,965) |      | Females<br>(n=6,741) |      | P value <sup>†</sup> |
|---------------------------|----------------|------|--------------------|------|----------------------|------|----------------------|
|                           | Mean           | SD   | Mean               | SD   | Mean                 | SD   |                      |
| Total energy (kj/day)     | 8626           | 1937 | 9365               | 1988 | 7980                 | 1638 | <0.001               |
| Carbohydrate (%E/day)     | 50.1           | 7.27 | 49.7               | 7.27 | 50.5                 | 7.24 | <0.001               |
| Protein (%E/day)          | 16.1           | 2.98 | 15.7               | 2.80 | 16.4                 | 3.09 | <0.001               |
| Total fat (%E/day)        | 31.0           | 5.62 | 30.7               | 5.58 | 31.3                 | 5.64 | <0.001               |
| Animal fat (%E/day)       | 17.4           | 5.30 | 17.3               | 5.32 | 17.4                 | 5.29 | 0.017                |
| Vegetable fat (%E/day)    | 16.7           | 4.43 | 13.4               | 4.40 | 13.9                 | 4.44 | <0.001               |
| Trans fat (%E/day)        | 0.51           | 0.19 | 0.50               | 0.19 | 0.51                 | 0.20 | 0.001                |
| Omega-3 (g/day)           | 2.00           | 0.80 | 2.09               | 0.83 | 1.93                 | 0.77 | <0.001               |
| Omega-6 (g/day)           | 11.0           | 4.18 | 11.7               | 4.41 | 10.4                 | 3.87 | <0.001               |
| Energy density (kj/g/day) | 6.45           | 1.43 | 6.82               | 1.41 | 6.13                 | 1.35 | <0.001               |
| Fiber (g/day)             | 18.0           | 5.58 | 18.5               | 5.86 | 17.6                 | 5.29 | <0.001               |

\* %E, percentage of total energy intake, kj, kilojoules, g, grams; SD, standard deviation.

<sup>†</sup> P value for linear regression analysis for dietary components differences between males and females adjusted for age, smoking status and BMI.

**Table S8. Changes in markers of CVD risk overall and stratified by sex per 1 unit increase in dietary patterns score after excluding energy misreporters from the analysis (n =8,470).**

|                             | All (n=8,470)     |                     |                   |                   | Males (n=3,769)   |                   |                   |                   | Females (n=4,701) |             |                   |             |
|-----------------------------|-------------------|---------------------|-------------------|-------------------|-------------------|-------------------|-------------------|-------------------|-------------------|-------------|-------------------|-------------|
|                             | Dietary Pattern 1 |                     | Dietary Pattern 2 |                   | Dietary Pattern 1 |                   | Dietary Pattern 2 |                   | Dietary Pattern 1 |             | Dietary Pattern 2 |             |
|                             | $\beta$ -coef     | 95% CI              | $\beta$ -coef     | 95% CI            | $\beta$ -coef     | 95% CI            | $\beta$ -coef     | 95% CI            | $\beta$ -coef     | 95% CI      | $\beta$ -coef     | 95% CI      |
| <b>Framingham risk</b>      |                   |                     |                   |                   |                   |                   |                   |                   |                   |             |                   |             |
| <b>score<sup>s</sup></b>    |                   |                     |                   |                   |                   |                   |                   |                   |                   |             |                   |             |
| Model 1                     | 0.07              | -0.11, 0.25         | 0.02              | -0.13, 0.18       | 0.16              | -0.15, 0.47       | -0.08             | -0.33, 0.17       | -0.03             | -0.23, 0.18 | 0.14              | -0.04, 0.32 |
| Model 2                     | -0.03             | -0.21, 0.15         | 0.05              | -0.10, 0.20       | -0.05             | -0.34, 0.24       | -0.01             | -0.24, 0.23       | -0.03             | -0.23, 0.18 | 0.15              | -0.02, 0.32 |
| <b>Systolic blood</b>       |                   |                     |                   |                   |                   |                   |                   |                   |                   |             |                   |             |
| <b>pressure<sup>s</sup></b> |                   |                     |                   |                   |                   |                   |                   |                   |                   |             |                   |             |
| Model 1                     | 0.22              | -0.16, 0.60         | <b>0.33</b>       | <b>0.01, 0.65</b> | 0.43              | -0.09, 0.95       | <b>0.47</b>       | <b>0.05, 0.90</b> | -0.01             | -0.56, 0.55 | 0.15              | -0.33, 0.63 |
| Model 3                     | <b>-0.34</b>      | <b>-0.68, -0.01</b> | -0.02             | -0.29, 0.26       | -0.30             | -0.76, 0.16       | 0.05              | -0.32, 0.41       | -0.39             | -0.88, 0.10 | -0.05             | -0.48, 0.37 |
| <b>Diastolic blood</b>      |                   |                     |                   |                   |                   |                   |                   |                   |                   |             |                   |             |
| <b>pressure<sup>s</sup></b> |                   |                     |                   |                   |                   |                   |                   |                   |                   |             |                   |             |
| Model 1                     | 0.19              | -0.02, 0.41         | 0.16              | -0.02, 0.34       | <b>0.38</b>       | <b>0.07, 0.69</b> | 0.18              | -0.07, 0.43       | 0.01              | -0.30, 0.30 | 0.14              | -0.12, 0.40 |
| Model 3                     | -0.09             | -0.28, 0.10         | 0.11              | -0.04, 0.27       | -0.05             | -0.32, 0.22       | 0.14              | -0.07, 0.40       | -0.15             | -0.43, 0.11 | 0.10              | -0.13, 0.33 |

**Cardiac index<sup>||</sup>**

|         |              |                     |       |             |              |                     |              |                     |              |                     |       |             |
|---------|--------------|---------------------|-------|-------------|--------------|---------------------|--------------|---------------------|--------------|---------------------|-------|-------------|
| Model 1 | <b>-0.03</b> | <b>-0.05, -0.01</b> | -0.01 | -0.03, 0.01 | <b>-0.02</b> | <b>-0.04, -0.01</b> | <b>-0.02</b> | <b>-0.03, -0.01</b> | -0.03        | -0.07, 0.01         | -0.01 | -0.03, 0.03 |
| Model 3 | <b>-0.03</b> | <b>-0.04, -0.01</b> | -0.01 | -0.03, 0.01 | <b>-0.02</b> | <b>-0.04, -0.01</b> | <b>-0.02</b> | <b>-0.03, -0.01</b> | <b>-0.03</b> | <b>-0.06, -0.01</b> | 0.01  | -0.01, 0.02 |

**LV ejection****fraction<sup>||</sup>**

|         |      |             |              |                     |       |             |              |                     |      |             |       |             |
|---------|------|-------------|--------------|---------------------|-------|-------------|--------------|---------------------|------|-------------|-------|-------------|
| Model 1 | 0.06 | -0.10, 0.21 | <b>-0.16</b> | <b>-0.29, -0.03</b> | -0.02 | -0.23, 0.20 | <b>-0.19</b> | <b>-0.37, -0.01</b> | 0.13 | -0.08, 0.35 | -0.12 | -0.30, 0.07 |
| Model 3 | 0.01 | -0.12, 0.13 | <b>-0.15</b> | <b>-0.27, -0.02</b> | -0.02 | -0.20, 0.16 | <b>-0.13</b> | <b>-0.27, -0.02</b> | 0.06 | -0.11, 0.23 | -0.12 | -0.27, 0.03 |

**Carotid IMT<sup>||</sup>**

|         |       |             |             |                   |       |             |             |                   |       |             |      |             |
|---------|-------|-------------|-------------|-------------------|-------|-------------|-------------|-------------------|-------|-------------|------|-------------|
| Model 1 | -1.26 | -3.89, 1.44 | <b>2.68</b> | <b>0.51, 4.84</b> | -2.49 | -6.36, 1.87 | <b>3.95</b> | <b>0.74, 7.16</b> | -0.53 | -3.87, 2.81 | 1.23 | -1.58, 4.05 |
| Model 3 | -1.52 | -4.19, 1.14 | 1.92        | -0.23, 4.08       | -1.81 | -5.95, 2.32 | 3.03        | -0.17, 6.23       | -1.03 | -4.36, 2.29 | 0.59 | -2.20, 3.38 |

**Augmentation****index<sup>||</sup>**

|         |      |             |       |             |      |             |       |             |      |             |       |             |
|---------|------|-------------|-------|-------------|------|-------------|-------|-------------|------|-------------|-------|-------------|
| Model 1 | 0.12 | -0.08, 0.31 | 0.01  | -0.15, 0.18 | 0.12 | -0.13, 0.36 | 0.04  | -0.17, 0.25 | 0.12 | -0.18, 0.42 | -0.03 | -0.29, 0.23 |
| Model 3 | 0.06 | -0.13, 0.25 | -0.10 | -0.26, 0.07 | 0.11 | -0.14, 0.35 | -0.07 | -0.28, 0.14 | 0.02 | -0.28, 0.31 | -0.15 | -0.41, 0.11 |

---

\*SD, standard deviation; LV, left ventricular; IMT, intima medial thickness. Values in bold represent statistically significant associations.

† Secondary outcome analyses included 12,486 individuals.

‡ Model 1: analysis adjusted for age and sex (except when used to stratify). Model 2: analysis adjusted for Model 1 plus Townsend deprivation index, physical activity, follow-up time and energy misreporting. Model 3: analysis adjusted for Model 2 plus BMI, smoking status and blood pressure medication use.

§ Regression coefficients from linear regression analyses represent change in outcome from baseline (2006-2010) to follow-up (2014-2020) per 1 unit increase in dietary pattern scores. Dietary pattern 1 scores ranged from -3.41 to 6.68 and dietary pattern 2 scores ranged from -5.89 to 5.03.

|| Regression coefficients from linear regression analyses represent values for the outcome at follow-up (2014-2020) per 1 unit increase in dietary pattern scores. Dietary pattern 1 scores ranged from -3.41 to 6.68 and dietary pattern 2 scores ranged from -5.89 to 5.03.

**Figure S1. Flow diagram of subjects included in the analysis of the UK Biobank.**

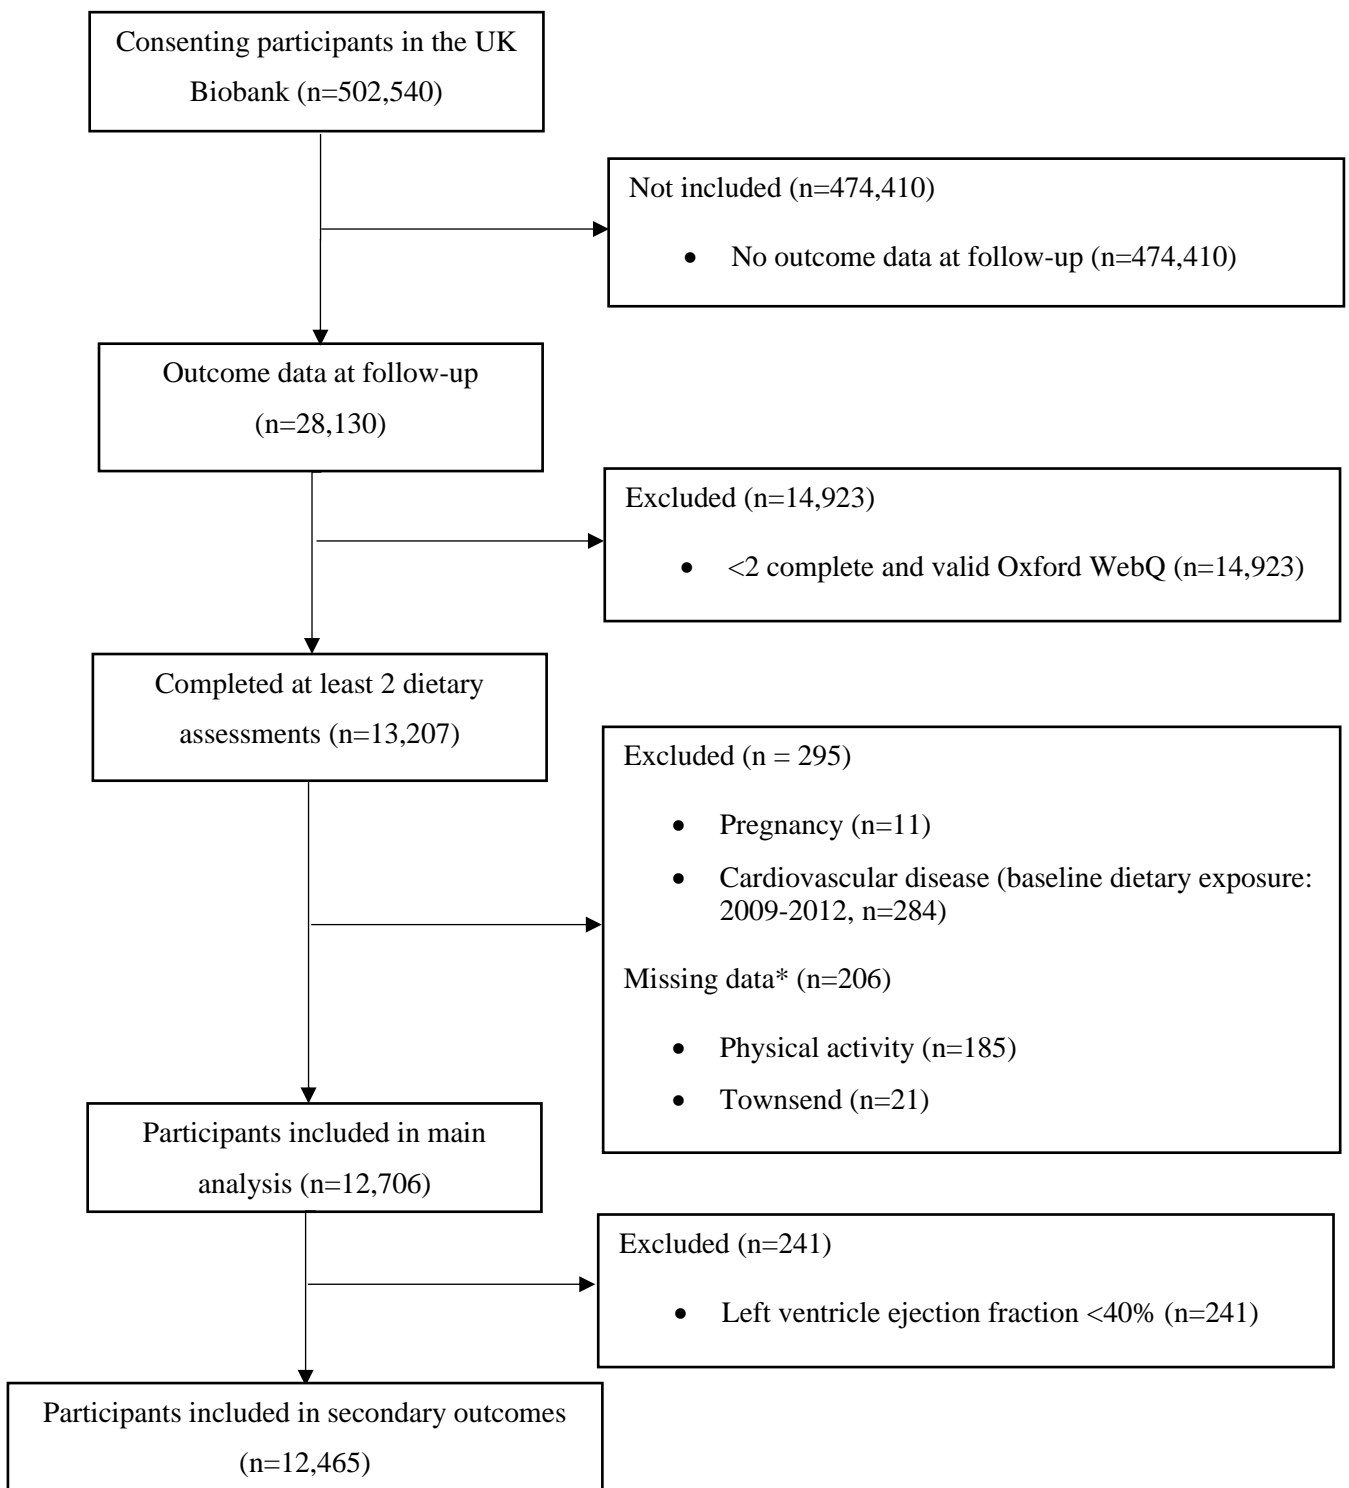

\*Excluded due to missing data or reported “don’t know” or “prefer not to answer”. The total number excluded represents being excluded for any combination of variables.



**Figure S2. Panel A: Histogram of participants follow-up in years. Panel B: Diagram showing exposure, covariate and outcome timepoints used in this study.**

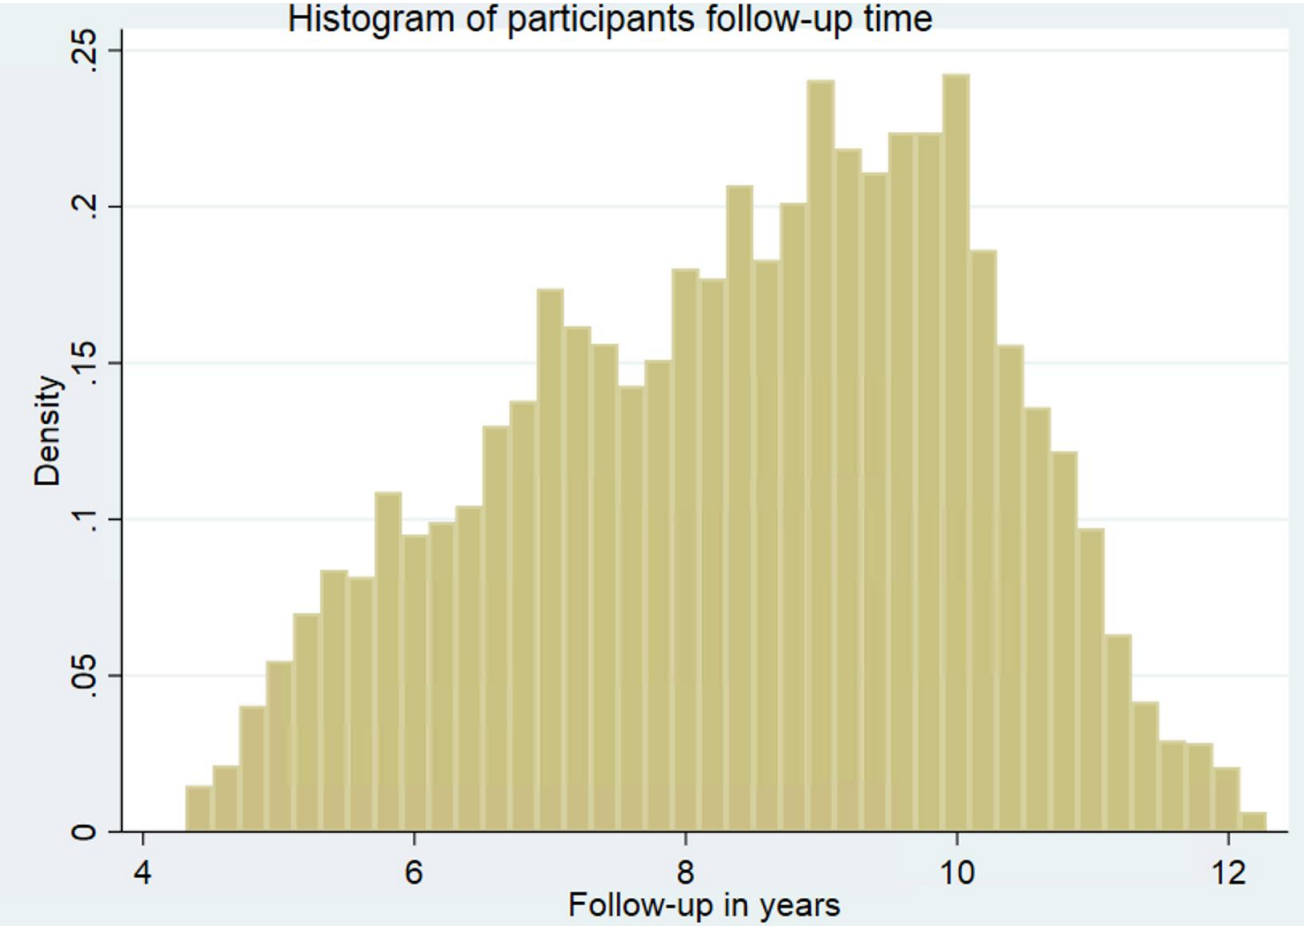

Panel A.

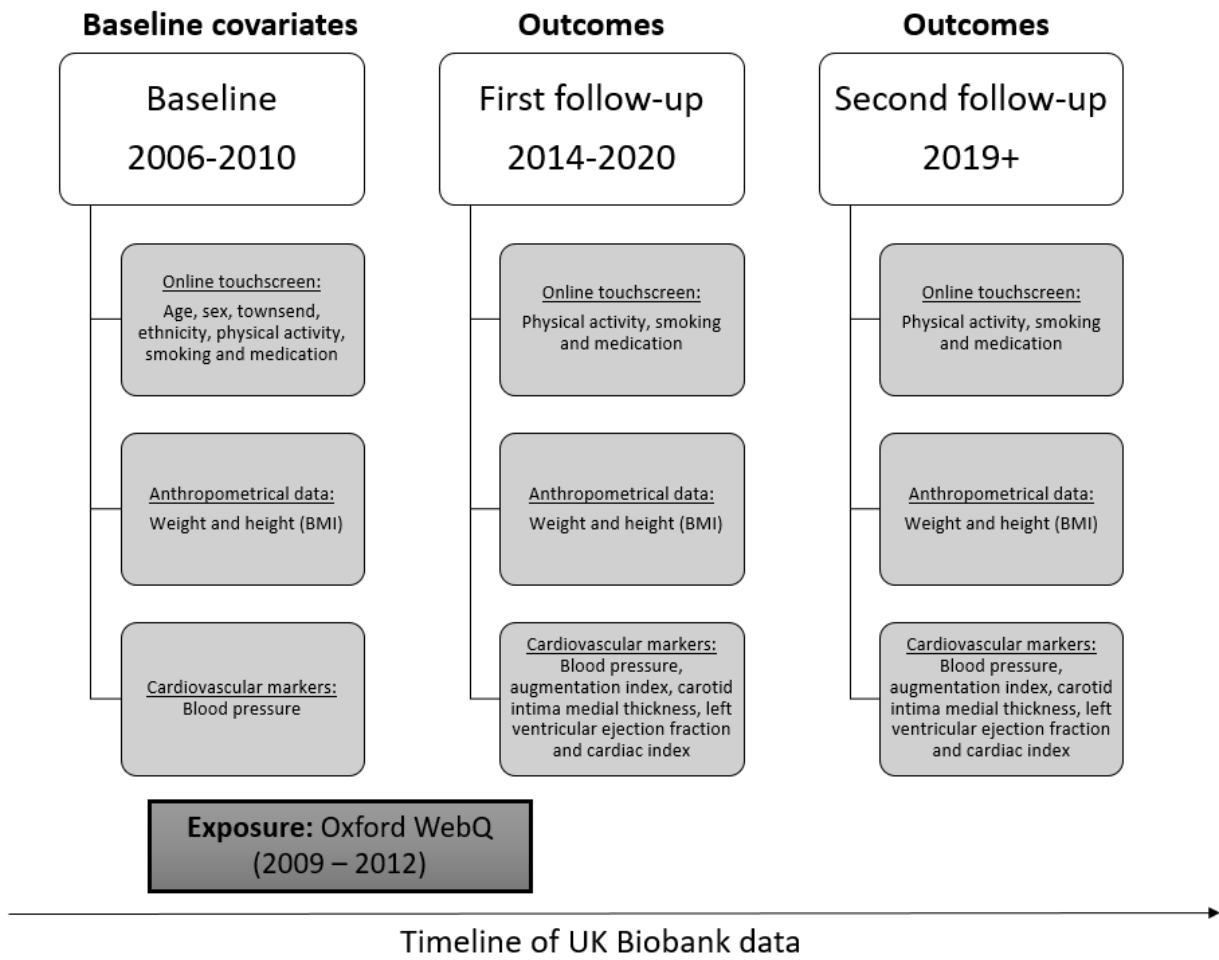

Panel B.

**Figure S3. Directed Acyclic Graph (DAG) of the relationship between dietary patterns and Framingham risk score.**

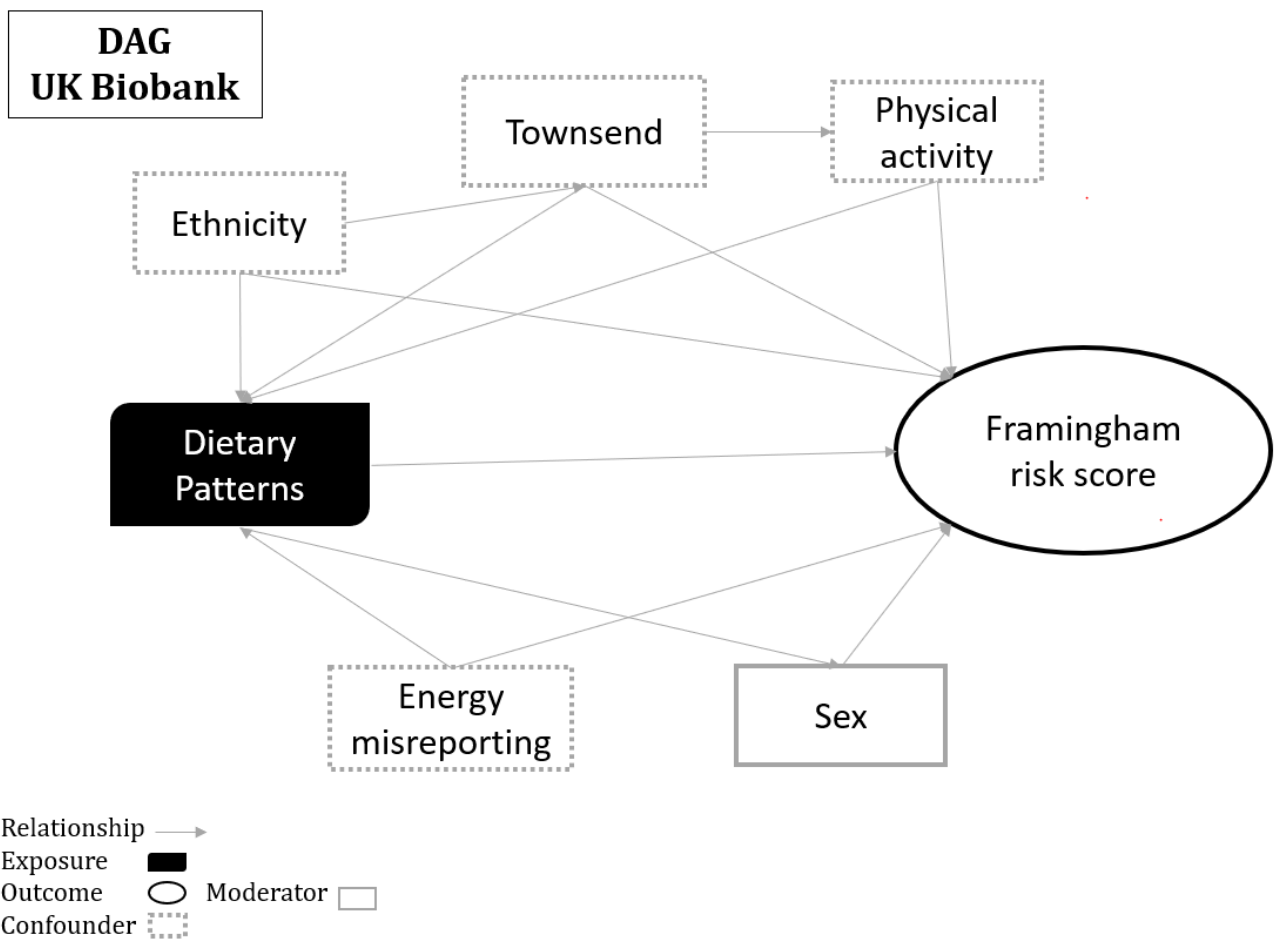

This graph represents the relationship between the exposure, dietary patterns based on SFA, PUFA, MUFA and the primary outcome Framingham risk score. The graph includes the causal pathway as well as possible moderators, mediators, confounders and covariates. Energy misreporting, physical activity, ethnicity and Townsend deprivation index were considered as confounders as they can influence both exposure and outcome. Sex was considered a moderator as it can influence the strength of the associations between exposure and outcome.

**Figure S4. Directed Acyclic Graph (DAG) of the relationship between dietary patterns and markers of cardiovascular disease (CVD) risk.**

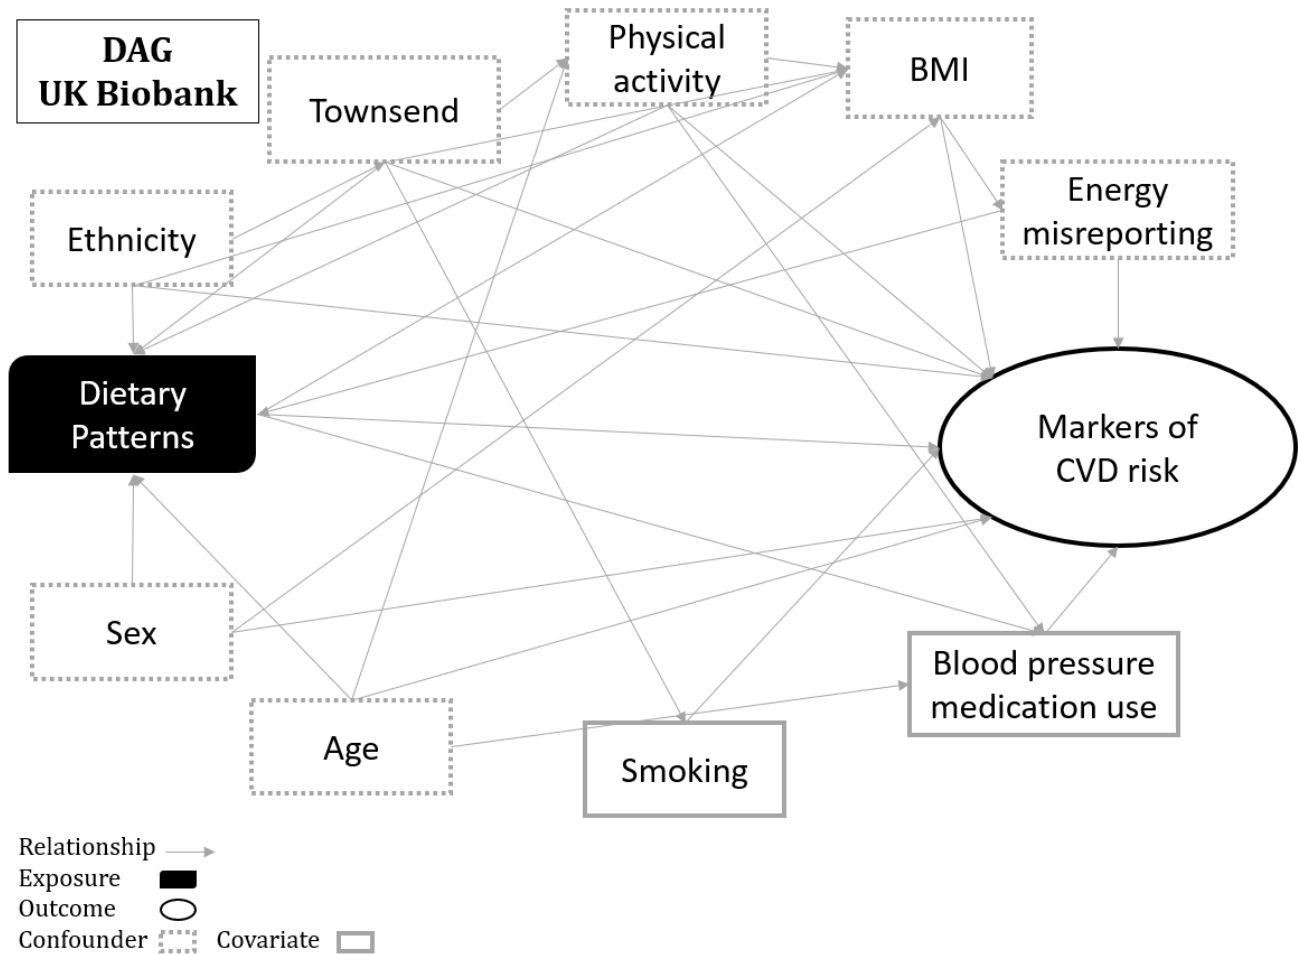

This graph represents the relationship between the exposure, dietary patterns based on SFA, PUFA, MUFA and the secondary outcomes cardiovascular health markers. The graph includes the causal pathway as well as possible moderators, mediators, confounders and covariates. Body mass index (BMI), energy misreporting, physical activity, ethnicity, sex and age were considered as confounders as they can influence both exposure and outcome. Lastly, smoking and blood pressure medication use were considered to be covariates as they only influence the outcome

**Figure S5. Factor loadings of the 48 food groups for dietary patterns 1 and 2.**

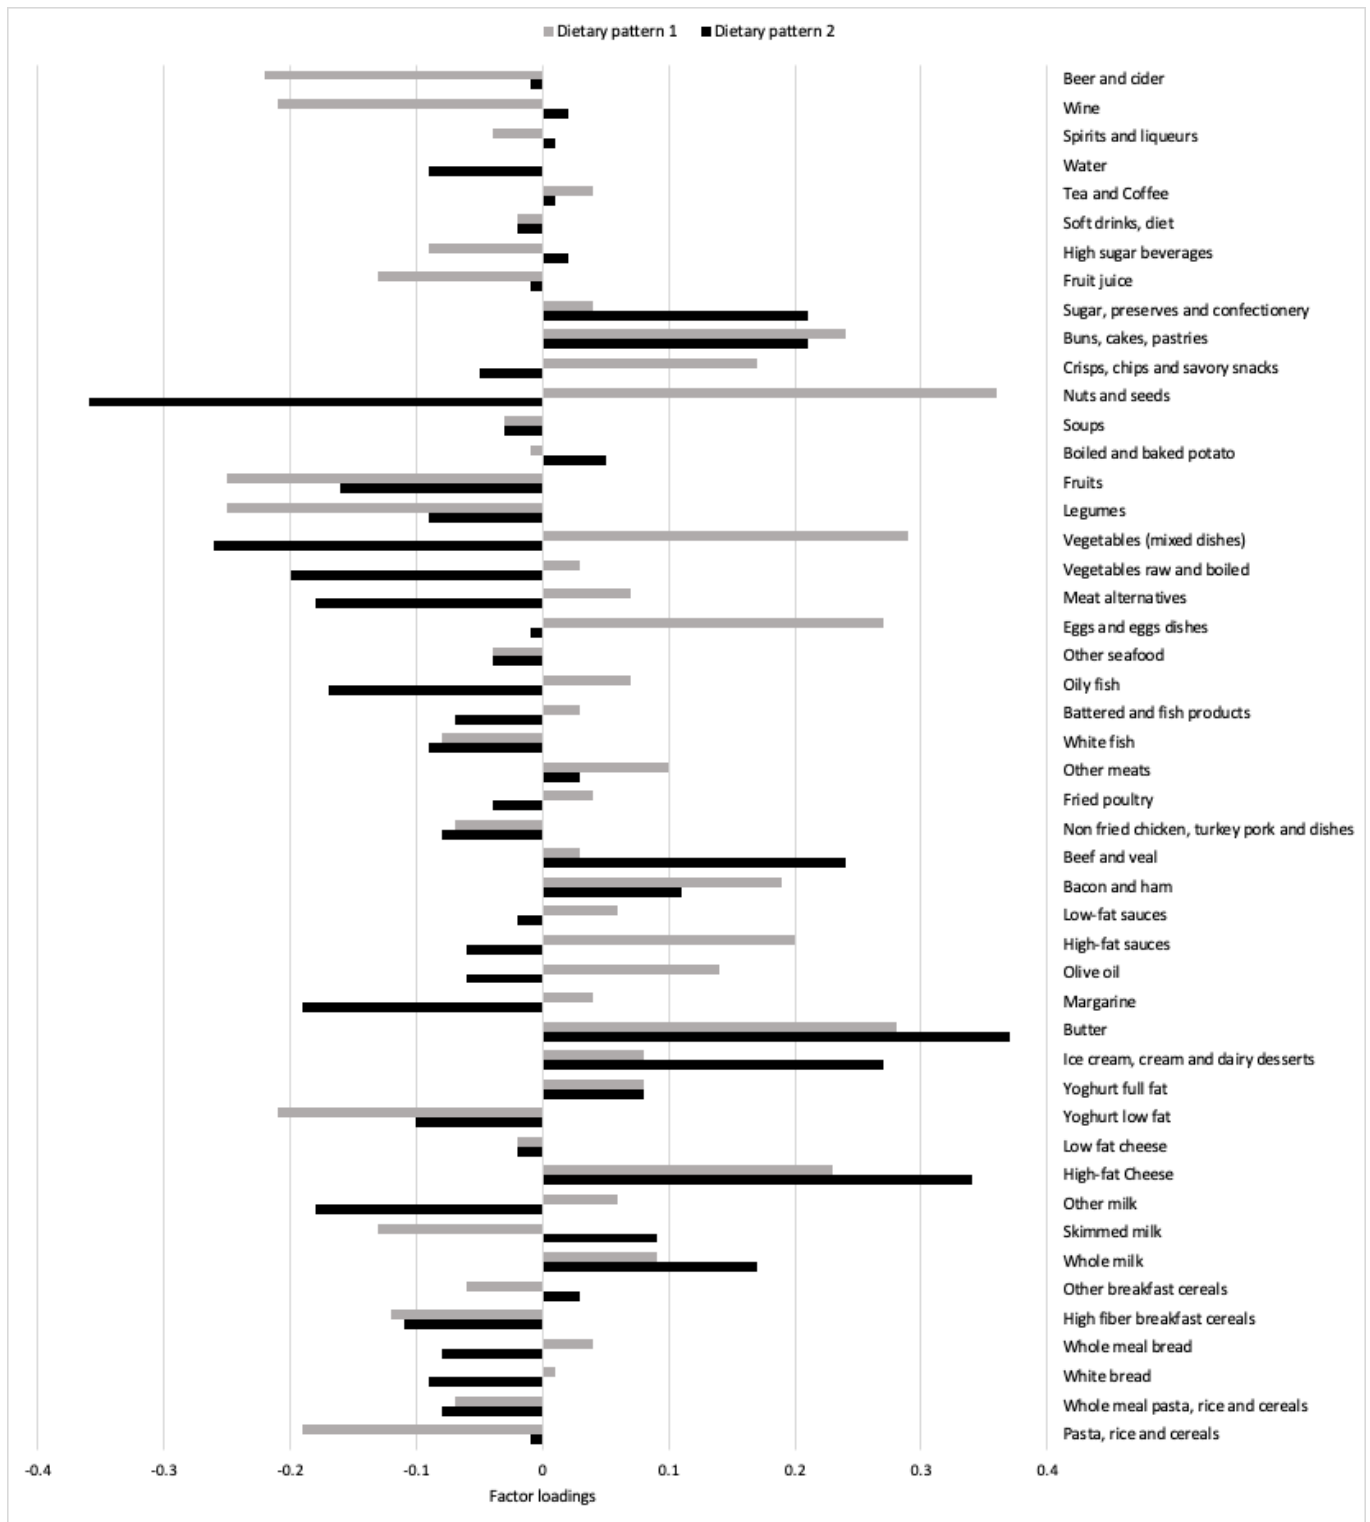

Supplement: JAH3-11-e024069-s001.pdf [file JAH3-11-e024069-s001.pdf]
